# Supplementary material for: Climate transition over the past two centuries revealed by lake Ebinur in Xinjiang, northwest China
Source: Copernicus journal article supplement (doi:10.5194/cp-2022-92), 2022-12-16

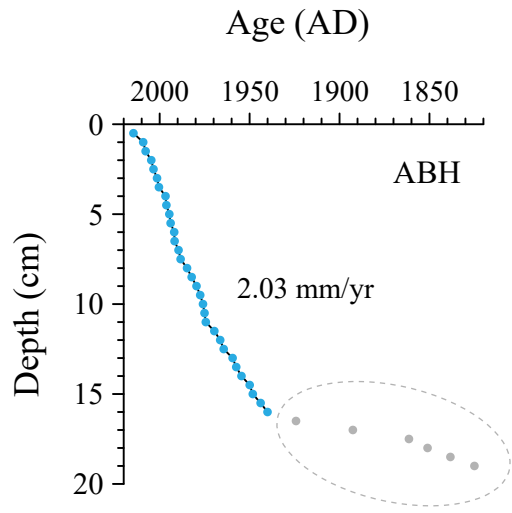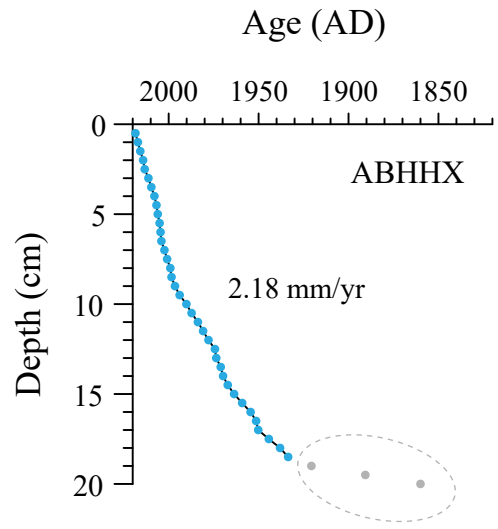

Supplement: Supplementary file [file cp-2022-92-AC3-supplement.pdf]
